# Supplementary material for: Contribution of Puma to Inflammatory Resolution During Early Pneumococcal Pneumonia
Source: Front Cell Infect Microbiol. 2022 May 26;12:886901. doi: 10.3389/fcimb.2022.886901 (PMC9177954; doi:10.3389/fcimb.2022.886901)
Supplement: Supplementary Table 3 — From Figure 4 in the main text, individual gene identities represented by red dots plotted for each of the three significantly different GO groups between WT and KO mice are provided. Gene expression differences are shown as log-fold change relative to PBS mock-infected WT or KO cohorts. [file Table_3.xlsx]

## Sheet: Sheet1
GO:0032735					GO:0035458					GO:0071346
	log-fold change KO	log-fold change WT				log-fold change KO	log-fold change WT				log-fold change KO	log-fold change WT
ENSMUSG00000001741	-0.17028	-0.139844			ENSMUSG00000009293	0.618185	0.696062			ENSMUSG00000000440	-0.637654	-0.726013
ENSMUSG00000002944	0.131347	-0.546031			ENSMUSG00000018899	2.73578	3.67087			ENSMUSG00000000631	-0.0698912	0.108168
ENSMUSG00000004296	0.830827	0.926707			ENSMUSG00000020307	0.379432	0.154988			ENSMUSG00000000791	0.877764	1.60233
ENSMUSG00000015452	0.343995	0.128112			ENSMUSG00000020464	1.00172	1.78374			ENSMUSG00000000982	1.93903	5.63339
ENSMUSG00000016206	0.802598	1.7445			ENSMUSG00000021494	0.376867	0.296902			ENSMUSG00000004069	0.016489	0.267645
ENSMUSG00000017652	1.40089	3.57589			ENSMUSG00000022126	6.30452	8.15707			ENSMUSG00000004296	0.830827	0.926707
ENSMUSG00000018899	2.73578	3.67087			ENSMUSG00000024349	1.09193	2.41451			ENSMUSG00000004626	0.302653	0.137102
ENSMUSG00000020275	0.613091	1.32908			ENSMUSG00000026104	2.35035	3.15712			ENSMUSG00000004814	-0.242932	-0.596341
ENSMUSG00000021457	0.492992	0.683186			ENSMUSG00000026535	-0.204309	0.142289			ENSMUSG00000006699	0.224783	0.297396
ENSMUSG00000024399	0.287291	0.360529			ENSMUSG00000026536	3.93689	5.88787			ENSMUSG00000006740	0.148433	0.266293
ENSMUSG00000024927	0.369806	0.937255			ENSMUSG00000028268	3.29327	4.83279			ENSMUSG00000009185	0.994904	1.72266
ENSMUSG00000025383	0.298522	1.10159			ENSMUSG00000028270	4.43303	6.2068			ENSMUSG00000017774	0.112822	-0.100181
ENSMUSG00000025929	1.05879	1.99478			ENSMUSG00000029203	0.239692	0.393791			ENSMUSG00000018160	0.0919628	0.135294
ENSMUSG00000025980	-0.112425	0.201574			ENSMUSG00000034459	4.50288	6.31853			ENSMUSG00000018899	2.73578	3.67087
ENSMUSG00000027164	0.0467602	0.28799			ENSMUSG00000036199	0.248171	0.233776			ENSMUSG00000018927	1.03939	0.40958
ENSMUSG00000027239	0.164424	-0.111295			ENSMUSG00000037849	2.40335	4.3271			ENSMUSG00000018930	3.42855	5.78521
ENSMUSG00000027995	1.81115	3.02558			ENSMUSG00000037860	0.656883	0.54916			ENSMUSG00000019122	1.2882	1.33237
ENSMUSG00000028581	0.423902	0.313868			ENSMUSG00000039997	1.66469	3.10795			ENSMUSG00000019471	0.0596988	0.0661365
ENSMUSG00000031132	-0.192568	-0.120814			ENSMUSG00000040264	0.64183	0.56755			ENSMUSG00000019987	-0.13618	0.96962
ENSMUSG00000031551	3.60963	6.41155			ENSMUSG00000043263	2.06687	3.79094			ENSMUSG00000020152	0.531268	0.856059
ENSMUSG00000031639	1.09517	2.11764			ENSMUSG00000046879	3.65201	4.95152			ENSMUSG00000020516	0.0247204	0.264718
ENSMUSG00000032041	0.442812	0.792901			ENSMUSG00000048806	0.772165	1.05795			ENSMUSG00000020546	-0.608044	-0.872306
ENSMUSG00000035678	0.537127	0.581079			ENSMUSG00000048852	2.95251	4.40951			ENSMUSG00000020676	1.11213	2.21782
ENSMUSG00000036908	0.666079	0.853535			ENSMUSG00000049734	2.48501	3.57592			ENSMUSG00000020826	1.48019	4.6912
ENSMUSG00000037944	0.245331	1.3975			ENSMUSG00000054072	4.48058	5.60234			ENSMUSG00000020903	0.351092	0.144632
ENSMUSG00000039005	0.389309	0.565698			ENSMUSG00000054203	4.2196	6.13417			ENSMUSG00000021262	0.363414	0.425839
ENSMUSG00000041515	1.18383	1.70915			ENSMUSG00000058163	2.07425	3.65427			ENSMUSG00000021559	0.324123	0.0408507
ENSMUSG00000042258	-0.446112	-0.597902			ENSMUSG00000062028	0.175424	-0.136066			ENSMUSG00000022126	6.30452	8.15707
ENSMUSG00000042817	0.0319775	-0.469873			ENSMUSG00000066677	1.1528	2.64309			ENSMUSG00000022906	2.3326	3.45516
ENSMUSG00000045322	0.71579	1.53896			ENSMUSG00000068329	0.492026	0.699905			ENSMUSG00000023235	-0.436347	-1.08847
ENSMUSG00000049093	-0.0137949	0.675825			ENSMUSG00000068606	2.72944	4.51535			ENSMUSG00000023259	0.503242	0.1354
ENSMUSG00000051177	-0.917923	-0.434004			ENSMUSG00000069874	2.65602	3.69082			ENSMUSG00000023460	0.38784	0.396102
ENSMUSG00000051498	0.852378	0.786175			ENSMUSG00000069893	1.12938	1.99033			ENSMUSG00000024411	-0.0270544	-0.0485654
ENSMUSG00000053137	-0.364166	0.0614094			ENSMUSG00000070501	1.12709	2.15041			ENSMUSG00000024539	0.747128	1.87304
ENSMUSG00000053436	-0.251023	-0.469778			ENSMUSG00000072244	0.458217	0.832093			ENSMUSG00000024789	0.991686	1.55831
ENSMUSG00000055170	2.76789	3.79802			ENSMUSG00000073489	4.06953	5.88316			ENSMUSG00000025278	-0.142088	1.13625
ENSMUSG00000055994	1.53623	2.68759			ENSMUSG00000073490	2.63822	3.82984			ENSMUSG00000025888	1.45216	2.44466
ENSMUSG00000057135	0.618248	1.09196			ENSMUSG00000073491	1.99237	3.61028			ENSMUSG00000026104	2.35035	3.15712
ENSMUSG00000071005	1.45384	2.12967			ENSMUSG00000073555	3.48472	4.83922			ENSMUSG00000026166	2.10427	3.15667
					ENSMUSG00000074896	3.42085	5.80949			ENSMUSG00000026341	0.827075	1.23196
					ENSMUSG00000078853	4.32886	5.05011			ENSMUSG00000026573	0.738592	1.55917
					ENSMUSG00000078920	3.56108	4.49701			ENSMUSG00000026615	0.28277	0.419001
					ENSMUSG00000078921	3.56824	4.56306			ENSMUSG00000026696	0.343557	0.330153
					ENSMUSG00000078922	4.77091	6.34726			ENSMUSG00000026712	0.640592	0.291473
					ENSMUSG00000090272	1.408	2.92854			ENSMUSG00000026728	-0.28577	-0.353609
					ENSMUSG00000090942	2.25684	3.25325			ENSMUSG00000026797	-0.180404	0.34615
					ENSMUSG00000104713	4.08919	5.55881			ENSMUSG00000026879	0.0898549	-0.378056
										ENSMUSG00000026946	1.58077	3.15491
										ENSMUSG00000027882	0.448596	1.09866
										ENSMUSG00000027995	1.81115	3.02558
										ENSMUSG00000028268	3.29327	4.83279
										ENSMUSG00000028270	4.43303	6.2068
										ENSMUSG00000028955	0.120856	0.277218
										ENSMUSG00000029298	1.96594	3.24094
										ENSMUSG00000029860	0.137133	0.178322
										ENSMUSG00000030055	0.516893	0.5327
										ENSMUSG00000030805	0.0777798	0.133399
										ENSMUSG00000030895	1.71901	3.15114
										ENSMUSG00000031165	0.47236	0.411195
										ENSMUSG00000031504	2.01601	3.09288
										ENSMUSG00000031778	0.00689894	1.96964
										ENSMUSG00000031779	0.964806	1.31586
										ENSMUSG00000031780	0.525568	1.00603
										ENSMUSG00000031988	-0.211879	-0.524478
										ENSMUSG00000032423	0.184207	0.402665
										ENSMUSG00000032494	-0.0208104	0.53486
										ENSMUSG00000034422	2.10837	4.02904
										ENSMUSG00000034438	1.9553	2.59644
										ENSMUSG00000034974	0.0535721	0.0557903
										ENSMUSG00000035042	1.62264	2.79744
										ENSMUSG00000035352	2.34251	3.82361
										ENSMUSG00000035373	4.02179	5.6871
										ENSMUSG00000035385	4.84565	6.41863
										ENSMUSG00000037902	0.140834	0.212315
										ENSMUSG00000038037	3.08107	4.08319
										ENSMUSG00000038844	-0.179193	-0.22403
										ENSMUSG00000039005	0.389309	0.565698
										ENSMUSG00000039232	1.60704	2.63073
										ENSMUSG00000040253	3.0164	3.82634
										ENSMUSG00000040264	0.64183	0.56755
										ENSMUSG00000041515	1.18383	1.70915
										ENSMUSG00000041598	1.07773	1.29327
										ENSMUSG00000043702	0.329516	0.344635
										ENSMUSG00000045664	0.103195	1.01747
										ENSMUSG00000046879	3.65201	4.95152
										ENSMUSG00000050732	0.68919	0.627672
										ENSMUSG00000051343	-0.189776	-0.53053
										ENSMUSG00000051596	-0.672286	-1.2754
										ENSMUSG00000052688	-0.169863	-0.251163
										ENSMUSG00000054892	0.0426447	0.493878
										ENSMUSG00000055170	2.76789	3.79802
										ENSMUSG00000055447	0.957548	2.00745
										ENSMUSG00000056737	0.642657	0.98716
										ENSMUSG00000057666	0.0125033	0.614501
										ENSMUSG00000059552	0.0388644	0.0929576
										ENSMUSG00000060550	0.830113	1.80267
										ENSMUSG00000062825	0.0122217	0.407103
										ENSMUSG00000069874	2.65602	3.69082
										ENSMUSG00000071005	1.45384	2.12967
										ENSMUSG00000073421	0.569873	0.667581
										ENSMUSG00000074129	0.35726	0.443534
										ENSMUSG00000074151	2.7406	3.84274
										ENSMUSG00000079363	3.48707	4.39011
										ENSMUSG00000092021	2.41892	4.7557
										ENSMUSG00000094686	-0.172048	-0.697951
										ENSMUSG00000095675	0.583353	-0.478689
										ENSMUSG00000104713	4.08919	5.55881
										ENSMUSG00000105096	4.83449	5.35206
										ENSMUSG00000105504	4.97419	6.71718
